# Supplementary material
Source: publisher figshare collection journal article supplement (https://karger.figshare.com/ndownloader/files/15432038)
Supplement: Supplementary file 1 [file 15432038]

## Supplementary Fig. 1. Mean baseline height SDS by year of study enrolment (US GH-treated patients who were GH naïve at study entry)

IGHD = isolated idiopathic growth hormone deficiency; ISS = idiopathic short stature; N = number; SDS = standard deviation score; SGA = small for gestational age; TS = Turner syndrome.

Methods:

- Mean ± SD were calculated for baseline characteristics for each year of study enrolment (1999 through 2013).
- Pearson regression coefficient (r) and p-values were calculated to correlate the baseline data with year of observation. P-values were considered significant at <0.05.
- Estimated linear regression lines for trends were fitted for each diagnosis (based on overall spread of data), but only those with statistical significance are shown.
- Note: means may be skewed in early or later years of enrolment by low N; means shown where N ≥10.
- Standard deviation scores (SDS) for height were calculated using age- and sex-matched data from the US National Center for Health Statistics (Ogden CL, Kuczmarski RJ, Flegal KM, Mei Z, Guo S, Wei R, et al.Centers for Disease Control and Prevention 2000 growth charts for the United States: improvements to the 1977 National Center for Health Statistics version. Pediatrics. 2002 Jan;109(1):45–60).
